# Supplementary material for: Characterization of Cationic Modified Short Linear Glucan and Fabrication of Complex Nanoparticles with Low and High Methoxy Pectin
Source: MDPI journal article supplement (doi:10.3390/foods10102509), 2021-10-19
Supplement: s1 [file s1]

**Table S1.** The enthalpy of the individual biopolymer and their nanocomplex particles.

| Sample        | $\Delta H$ (J/g) |
|---------------|------------------|
| LMP           | 138.56           |
| LMP-CSLG 0.5  | 102.54           |
| LMP-CSLG 1.0  | 113.62           |
| LMP-CSLG 2.5  | 118.25           |
| LMP-CSLG 5.0  | 129.63           |
| HMP           | 145.34           |
| HMP-CSLG 0.5  | 124.52           |
| HMP-CSLG 1.0  | 129.58           |
| HMP-CSLG 2.5  | 133.47           |
| HMP-CSLG 5.0  | 138.62           |
| CMCS          | 97.68            |
| CMCS-CSLG 0.5 | 76.59            |
| CMCS-CSLG 1.0 | 80.38            |
| CMCS-CSLG 2.5 | 87.54            |
| CMCS-CSLG 5.0 | 92.46            |
